# Supplementary material for: Plasma-induced defect engineering of porous metal–organic framework nanosheet arrays for efficient water splitting
Source: Royal Society of Chemistry journal article supplement (doi:10.1039/d2cc03633a), 2022-01-01
Supplement: d2cc03633a1.pdf [file d2cc03633a1.pdf]

# Plasma-induced defects engineering of porous metal–organic framework nanosheet arrays for efficient water splitting

Junnan Song,<sup>a,b</sup> Sheng Zhao,<sup>b</sup> Di Liu,<sup>c</sup> Yixing Xiong,<sup>b</sup> Feng Hu,<sup>b</sup> Linlin Li,<sup>b</sup> Lei Li,<sup>\*a</sup> Hui Pan,<sup>\*c</sup> Shengjie Peng<sup>\*b</sup>

<sup>a</sup> College of Biological, Chemical Sciences and Engineering, Jiaxing University, Jiaxing, Zhejiang 314001, China. E-mail: leili@mail.zjxu.edu.cn

<sup>b</sup> College of Materials Science and Technology, Nanjing University of Aeronautics and Astronautics, Nanjing 210016, China. E-mail: pengshengjie@nuaa.edu.cn

<sup>c</sup> Institute of Applied Physics and Materials Engineering, University of Macau, Macao SAR. E-mail: huipan@um.edu.mo

## Experimental

### Chemicals

Terephthalic Acid (H<sub>2</sub>BDC), iron (III) chloride hexahydrate (FeCl<sub>3</sub>·6H<sub>2</sub>O), dimethyl formamide (DMF), hydrochloric acid (HCl), and absolute ethyl alcohol purchased from Aladdin were used directly without further purification.

### Synthesis of Fe MOF/IF

Fe MOF/IF nanosheet arrays were prepared by following a simple hydrothermal method. Specifically, 0.127 g H<sub>2</sub>BDC and 0.413 g FeCl<sub>3</sub>·6H<sub>2</sub>O were dissolved in the mixed solution of DMF (32 mL), ultrapure water (1 mL), HCl (1 mL), and absolute ethyl alcohol (2 mL). After complete dissolution, the mixed solution was transferred into a 50 mL Teflon-lined autoclave. Subsequently, a piece of commercial Fe foam (IF, 3 × 3 cm<sup>2</sup>) was introduced into the above mixed solution and maintained at 140 °C for 12 h (The IF substrates were ultrasonically washed with deionized water and ethanol several times to clean the surface impurities, then put them into 6.0 M HCl solution for 5 min to remove the surface oxide layers, and rinsed subsequently with water and

ethanol, finally dried in vacuum). After that, the products were washed with ultrapure water and ethyl alcohol several times and dried at 60 °C overnight in vacuum. The obtained self-supporting sample was labelled as Fe MOF/IF.

### *Synthesis of O<sub>v</sub>-Fe MOF/IF*

The O<sub>v</sub>-Fe MOF/IF was obtained by treating the pristine Fe MOF/IF with N<sub>2</sub> plasma. RF power of 200 W, the pressure of 3 Pa, a suitable bias voltage, and an N<sub>2</sub> flow rate of 80 sccm were employed for the plasma treatment. For comparison, a series of comparative samples with different irradiation time (10, 20, and 30 min) have been synthesized, and the obtained samples were denoted as O<sub>v</sub>-Fe MOF/IF-10min, O<sub>v</sub>-Fe MOF/IF-20min, and O<sub>v</sub>-Fe MOF/IF-30min, respectively.

### *Characterization*

Morphology and microstructure of samples were observed via field-emission scanning electron microscope (FESEM, Regulus 8100) and transmission electron microscope (TEM, FEI Tecnai G2 F20) as well as high resolution TEM (HRTEM). TEM mapping was also conducted on FEI Tecnai G2 F20. The Brunauer–Emmett–Teller (BET) surface area was determined using nitrogen adsorption-desorption carried by the Surface Area (V-Sorb 2800P, Gold APP Instruments, China). The phase structures were characterized by X-ray diffractometer (XRD, Bruker D8 ADVANCE). The elemental composition and chemical state were confirmed by X-ray photoelectron spectroscopy (XPS Escalab 250Xi). The Raman measurements were accomplished by a Raman micro spectrometer (Thermo Fischer DXR) with 532 nm of excitation. The electron paramagnetic resonance (EPR) data was tested by the Bruker A300 in N<sub>2</sub> test mode. X-ray absorption fine structure spectra were measured under room temperature using the transmission mode of the XAFCA beamline in the Singapore Synchrotron Light Source. Extended X-ray absorption fine structure data was interpreted utilizing WINXAS 3.1 code, where it was normalized and then transformed to momentum space (k) from the initial energy space. The chemical states of the materials were studied by X-ray photoelectron spectroscopy (Thermo ESCALAB 250).

### *Electrochemical measurements*

All electrochemical measurements were performed on an electrochemical workstation (Autolab PGSTAT302, Eco Chemie, Netherlands) with a conventional three-electrode electrochemical cell system, in which the graphite rod and platinum foil were used as the counter electrode, as-prepared samples were directly used as the working electrodes, and Ag/AgCl was used as the reference electrode. The estimated electrochemical double layer capacitances ( $C_{dl}$ ) were obtained by cycle curves (CV) tests in a non-Faradaic potential region at different scan rates of 1, 2, 5, 10, 20, 30, 40 and 50  $\text{mV s}^{-1}$ . All of the polarization curves were recorded via linear sweep voltammetry (LSV) measurements at a scanning rate of 5  $\text{mV s}^{-1}$  and were recorded with iR compensation. And all the potentials were referenced to RHE according to the Nernst equation:

$$E_{\text{RHE}} = E_{\text{Ag/AgCl}} + 0.198 + 0.0591 \times \text{pH}$$

The electrochemical impedance spectroscopy (EIS) was conducted over the frequency range of 0.01–105 kHz with an amplitude of 10 mV. The stability was tested at a constant current density of 10  $\text{mA cm}^{-2}$  in 1.0 M KOH. The overall water splitting was conducted in a single-compensation cell, with the as-obtained electrodes as the working electrode and the counter electrode.

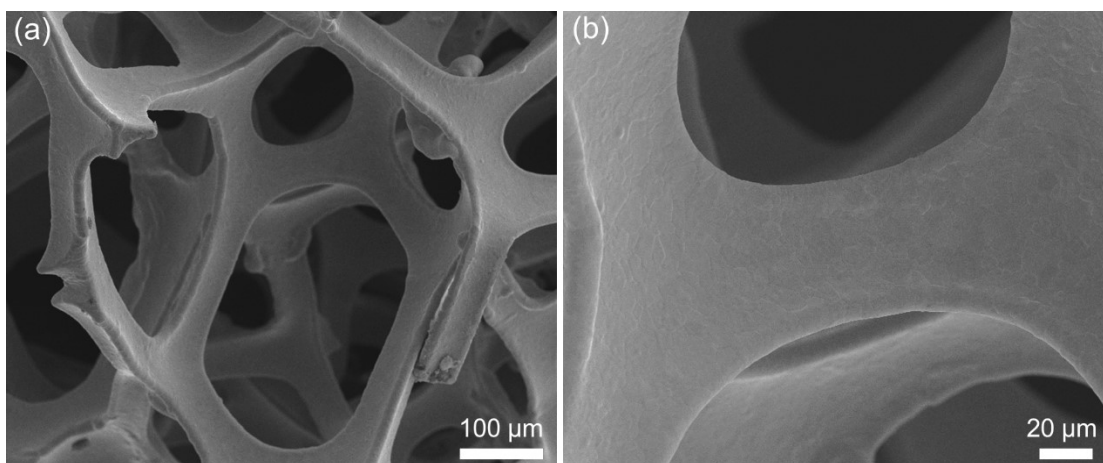

**Fig. S1** a) Low-magnified and b) high-magnified SEM images of bare IF.

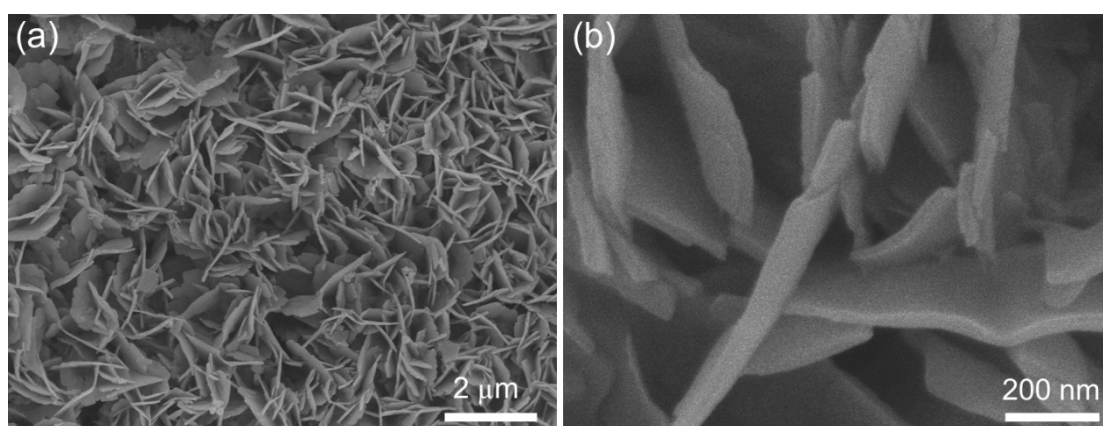

**Fig. S2** a) Low-magnified and b) high-magnified SEM images of pristine Fe MOF/IF nanosheets, respectively.

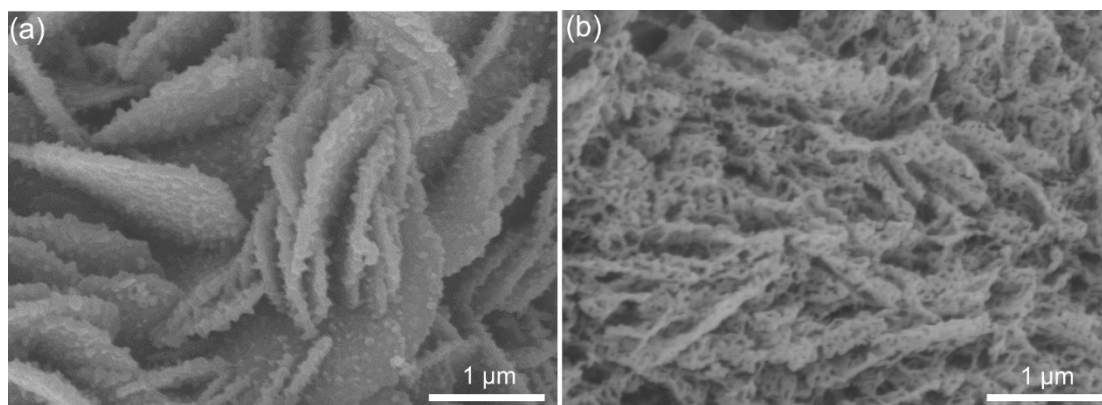

**Fig. S3** SEM images of Fe MOF/IF nanosheets treated by plasma for a) 10 min and b) 30 min at 200 W.

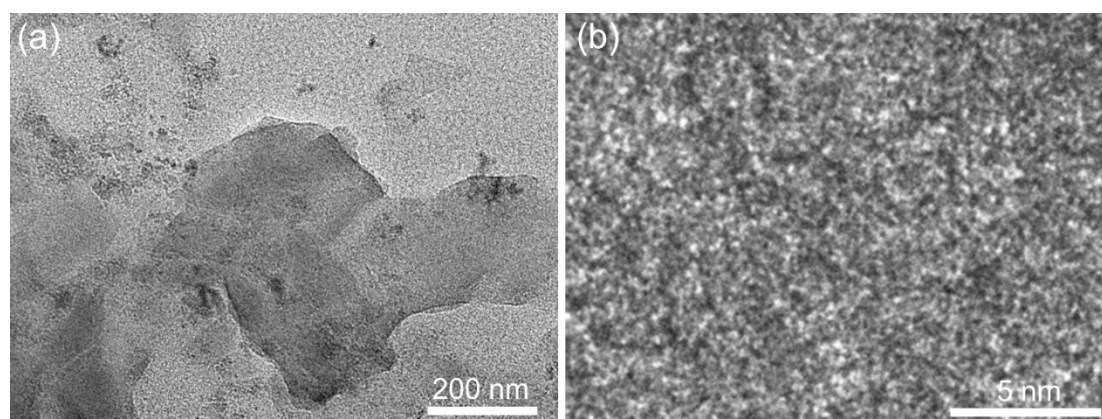

**Fig. S4** a) TEM and b) HRTEM images of pristine Fe MOF/IF nanosheets, respectively.

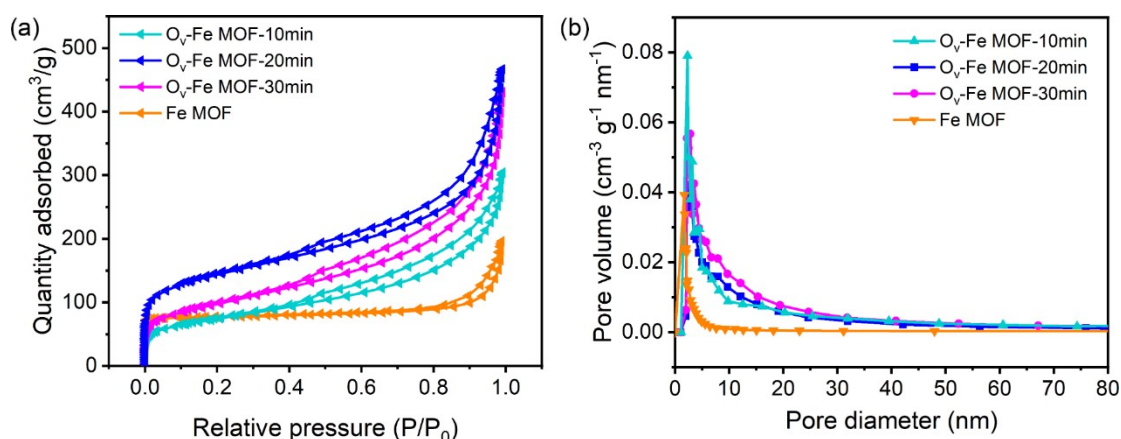

**Fig. S5** a) Nitrogen adsorption and desorption curves, and b) size distribution plots of O<sub>v</sub>-Fe MOF/IF and pristine Fe MOF/IF nanosheets.

The BET specific surface area of materials was obtained by measuring the MOF powder scraped from the Fe foam substrate. The specific surface area of O<sub>v</sub>-Fe MOF/IF samples was calculated to be 262.85 m<sup>2</sup> g<sup>-1</sup> for O<sub>v</sub>-Fe MOF/IF-10min, 502.51 m<sup>2</sup> g<sup>-1</sup> for Ov-Fe MOF/IF-20min, and 347.56 m<sup>2</sup> g<sup>-1</sup> for O<sub>v</sub>-Fe MOF/IF-30min, which are higher than that of pristine Fe MOF (112.51 m<sup>2</sup> g<sup>-1</sup>), demonstrating the plasma treatment could effectively increase the surface area of Fe MOF. Additionally, both BJH median pore width and SF median pore width show an increasing trend with the extension of plasma processing time (**Table S1**).

**Table S1.** Parameters of BJH median pore width and SF median pore width of Fe MOF with different plasma treatment time.

| Samples            | BJH median pore width (nm) <sup>a)</sup> | SF median pore width (nm) <sup>b)</sup> |
|--------------------|------------------------------------------|-----------------------------------------|
| Fe MOF             | 9.294                                    | 0.703                                   |
| Ov-Fe MOF/IF-10min | 9.849                                    | 0.743                                   |
| Ov-Fe MOF/IF-20min | 10.133                                   | 0.737                                   |
| Ov-Fe MOF/IF-30min | 27.102                                   | 1.169                                   |

a) Barnes-Jewish Hospital (BJH) adsorption median pore width

b) Saito-Foley (SF) median pore width

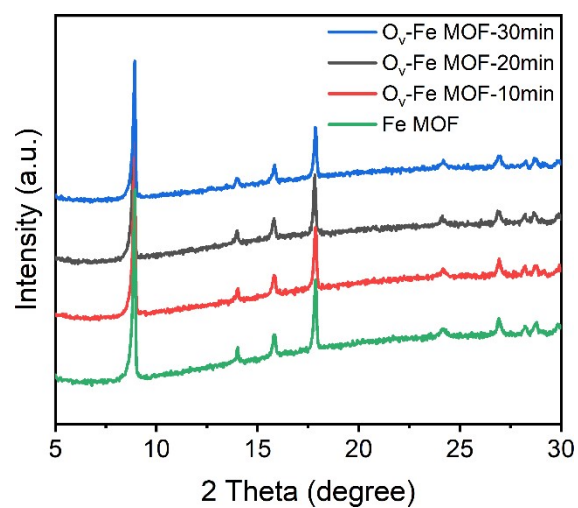

**Fig. S6** XRD patterns of pristine Fe MOF/IF and  $O_v$ -Fe MOF/IF nanosheets.

The structure of Fe MOFs is consistent with MIL-53 (Adv. Energy Mater. 2018, 8, 1800584.), in which Fe ions are coordination centers and linked by terephthalic acid.

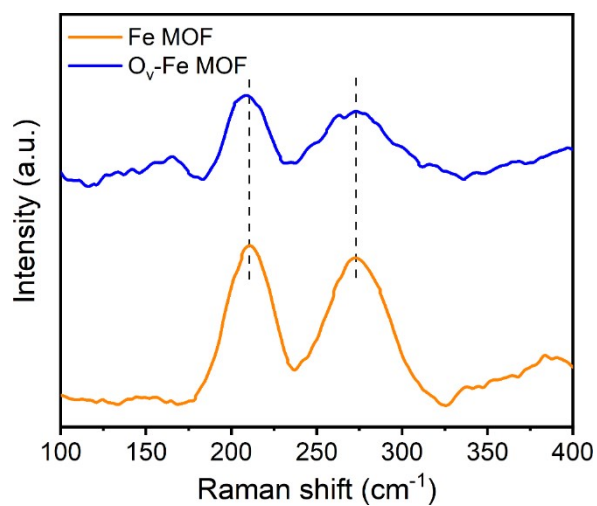

**Fig. S7** Raman spectra of pristine Fe MOF/IF and  $O_v$ -Fe MOF/IF nanosheets.

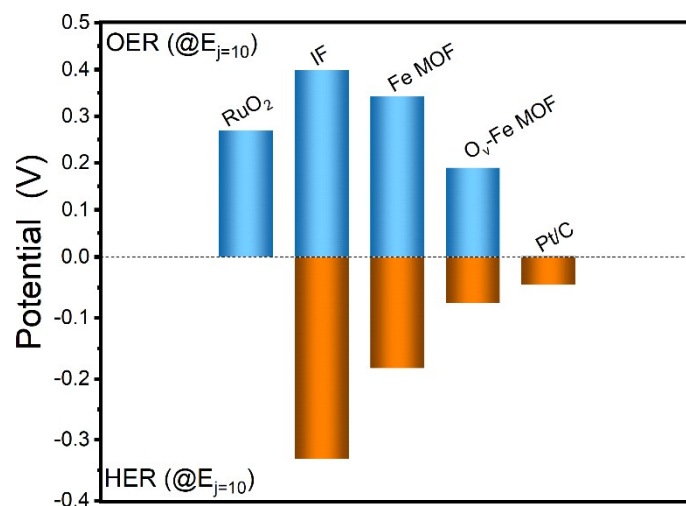

**Fig. S8** The overall performance comparison histogram for all catalysts by  $\Delta E$  (The potential gap between HER and the OER potential at 10 mA cm<sup>-2</sup>).

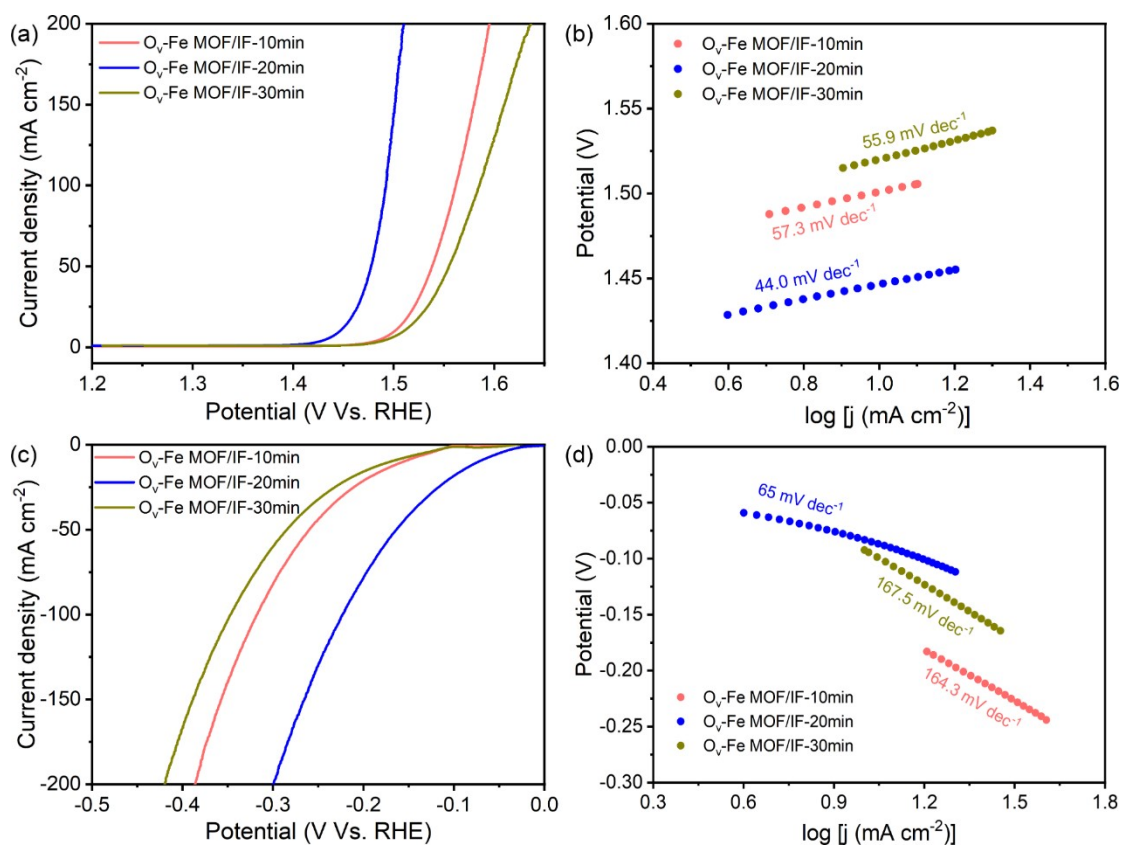

**Fig. S9** Catalytic performance of Fe MOF/IF nanosheets treated by plasma for different time towards for a and b) OER and c and d) HER. a, c) The polarization curves and b, d) Tafel plots.

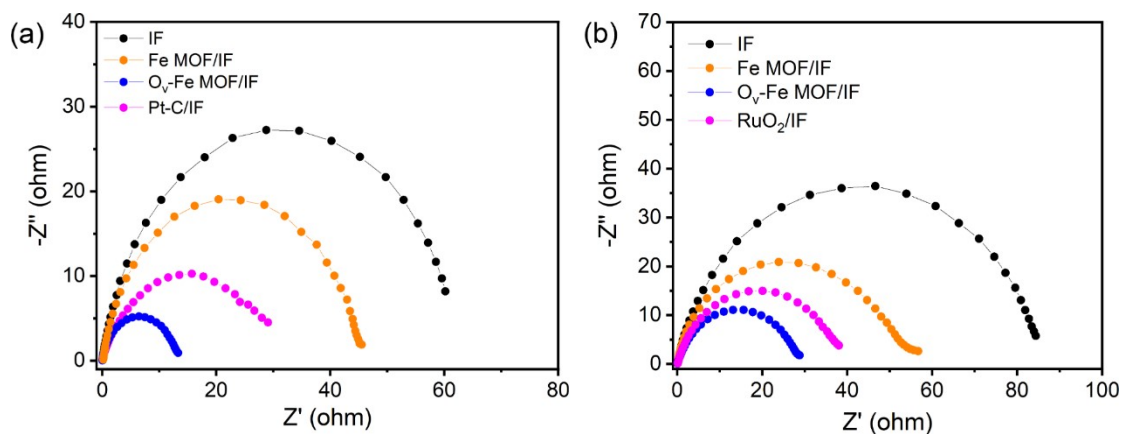

**Fig. S10** a) HER and b) OER EIS spectra of pristine IF, Fe MOF/IF,  $O_V$ -Fe MOF/IF, and Pt/C/IF catalysts, respectively.

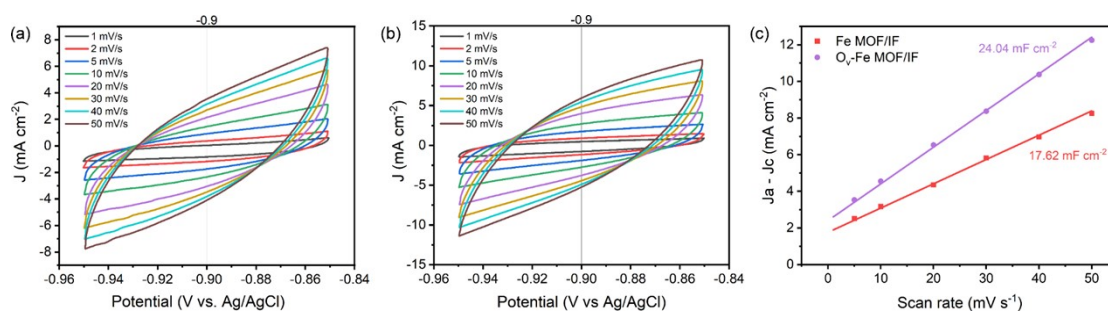

**Fig. S11** CV curves measured at different scans for a) Fe MOF/IF, and b)  $O_V$ -Fe MOF/IF. c)  $C_{dl}$  evaluation for Fe MOF/IF and  $O_V$ -Fe MOF/IF.

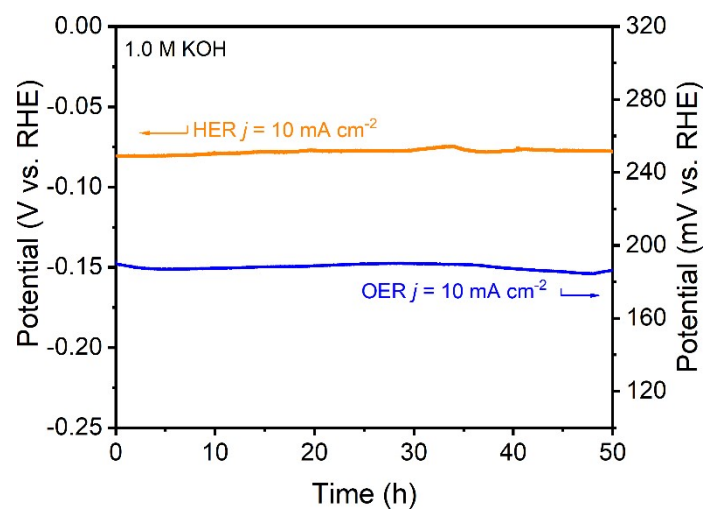

**Fig. S12** Chronoamperometric curves of O<sub>v</sub>-Fe MOF/IF toward OER and HER.

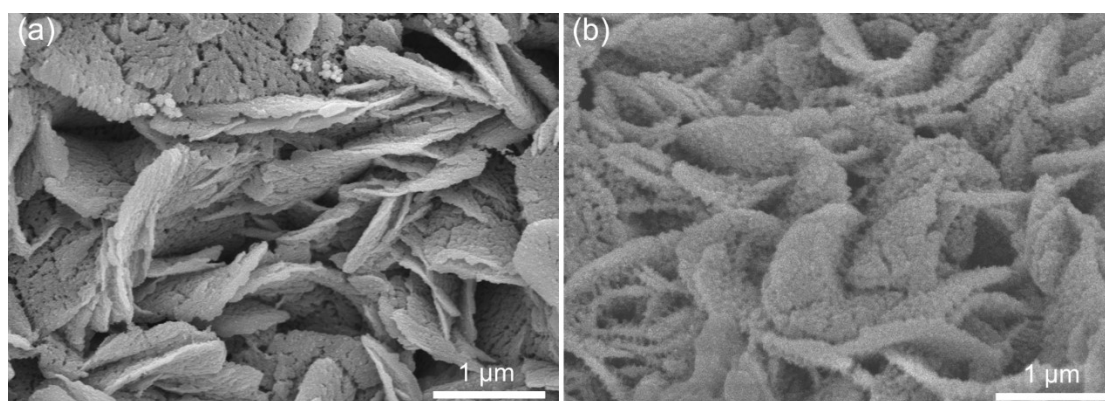

**Fig. S13** SEM images of O<sub>v</sub>-Fe MOF/IF nanosheets after a) HER and b) OER test.

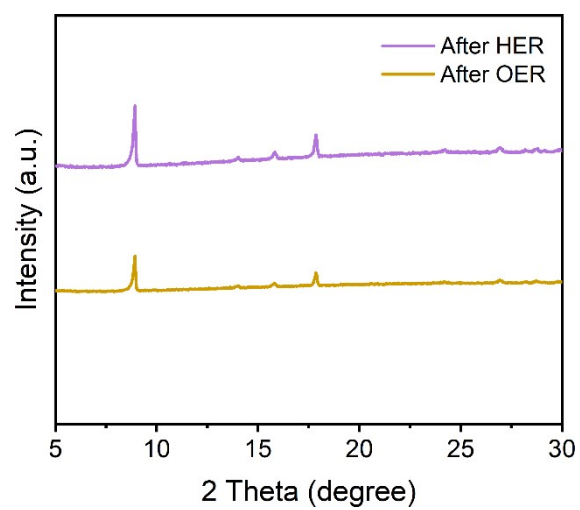

**Fig. S14** XRD patterns of O<sub>v</sub>-Fe MOF/IF nanosheets after water splitting test.

**Table S2.** Comparison of MOF-based catalysts for electrocatalytic OER in 1 M KOH in recent publications.

| Catalysts                                | $\eta_{\text{OER}_{10}}$ (mV) | Ref.                                          |
|------------------------------------------|-------------------------------|-----------------------------------------------|
| <b>O<sub>v</sub>-Fe MOF/IF</b>           | <b>200</b>                    | <b>This work</b>                              |
| NiFe-MS/MOF@NF                           | 230@50                        | Adv. Sci. 2020, 7, 2001965.                   |
| FeNi(BDC)(DMF,F)                         | 227@60                        | Appl. Catal. B: Environ. 2019, 258, 118023.   |
| CoP/D-CoCu-MOF-300                       | 295                           | J. Mater. Chem. A, 2020, 8, 14099–14105.      |
| CoCu-MOF NBs                             | 271                           | Angew. Chem. Int. Ed. 2021, 60, 26397–26402.  |
| IrO <sub>2</sub> @IrMOF-ppy              | 207                           | J. Mater. Chem. A, 2020, 8, 25687–25695.      |
| a <sub>g</sub> ZIF-62(Co)-Fe-CC          | 256                           | Angew. Chem. Int. Ed. 2022, 61, 202112880.    |
| Ni@CoO@CoMOFC                            | 247                           | J. Mater. Chem. A, 2021, 9, 22597–22602.      |
| defect-Ni-MOF                            | 219                           | Small 2020, 16, 1906564.                      |
| 2D Ni-MOF-250                            | 250@50                        | J. Mater. Chem. A, 2020, 8, 2140–2146.        |
| 2D MOF-Fe/Co                             | 238                           | Angew. Chem. 2021, 133, 12204 – 12209.        |
| Ru/NiFe(OH) <sub>x</sub> /NiFe-MOF       | 242                           | J. Mater. Chem. A, 2021, 9, 24670–24676.      |
| NiFe-MOF/NF                              | 195                           | Angew. Chem. 2021, 133, 12880 –12884.         |
| Ir-Ni-NS                                 | 270                           | Adv. Mater. Interfaces 2021, 8, 2002034.      |
| cMOF/LDH                                 | 216@50                        | Adv. Mater. 2021, 33, 2006351.                |
| MCCF/NiMn-MOFs                           | 280                           | Angew. Chem. Int. Ed. 2020, 59, 18234 –18239. |
| Ni-doped FeF <sub>2</sub>                | 275                           | Chem. Commun., 2020, 56, 7889—7892.           |
| Fe–Ni LDH/MOF-b2                         | 255                           | Nanoscale, 2020, 12, 14514–14523.             |
| Ni <sub>0.9</sub> Fe <sub>0.1</sub> -MOF | 198                           | Nature Energy 2020, 5, 881–890.               |
| 3D Ni-MOF/NF                             | 350                           | Inorg. Chem. Front., 2021, 8, 3007–3011.      |
| Br-Ni-MOF                                | 306                           | Sci. Adv. 2021, 7, eabk0919.                  |
| CoNi MOF-CNTs                            | 306                           | J. Mater. Chem. A, 2022, 10, 4936–4943.       |
| Co MOF/CC                                | 346                           | Small 2021, 17, 2105150.                      |
| NiV-MOF NAs                              | 189                           | Small Methods 2021, 5, 2100573.               |

**Table S3.** Comparison of MOF-based catalysts for electrocatalytic HER in 1 M KOH in recent publications.

| Catalysts                                              | $\eta_{10}$ (mV) | Ref.                                               |
|--------------------------------------------------------|------------------|----------------------------------------------------|
| <b>O<sub>v</sub>-Fe MOF/IF</b>                         | <b>72</b>        | <b>This work</b>                                   |
| Ni <sub>3</sub> (Ni <sub>3</sub> ·HAHATN) <sub>2</sub> | 115              | Adv. Sci. 2020, 7, 2000012.                        |
| NiRu <sub>0.13</sub> -BDC                              | 36               | Nat. Commun. 2021, 12, 1369.                       |
| FePc@Ni-MOF                                            | 334              | Inorg. Chem. 2021, 60, 13, 9987–9995.              |
| Fe(OH) <sub>x</sub> @Cu-MOF                            | 112              | Sci. Adv. 2021, 7, eabg2580.                       |
| Pt/MOF-O                                               | 66               | J. Am. Chem. Soc. 2021, 143, 16512–16518.          |
| Co-MOF                                                 | 34               | Angew. Chem. 2019, 131, 4727–4732.                 |
| Meso-Cu-BTC                                            | 89.32            | Mater. Res. Express 2020, 7, 114001.               |
| Co-BDC/MoS <sub>2</sub>                                | 248              | Small 2019, 15, 1805511.                           |
| 2D Ni-MOF@Pt                                           | 102              | Nano Lett. 2019, 19, 8447–8453.                    |
| NC-1/2-5                                               | 372              | ACS Appl. Mater. Interfaces 2020, 12, 45987–45996. |
| Ru@Ni-MOF                                              | 22               | Angew. Chem. 2021, 133, 22450–22456.               |
| CoNi-MOF-PCG                                           | 265              | Inorg. Chem. Commun. 2021, 127, 108525.            |
| Ni-MOF/Ni <sub>2</sub> P@EG                            | 132              | Nano Energy 2020, 71, 104621.                      |
| Ni@Co-MOFs                                             | 349              | Inorg. Chem. 2021, 60, 13434–13439.                |

**Table S4.** Comparison of MOF-based catalysts for electrocatalytic water splitting in 1 M KOH in recent publications.

| Catalysts                                   | E <sub>10</sub> (V) | Ref.                                        |
|---------------------------------------------|---------------------|---------------------------------------------|
| <b>O<sub>v</sub>-Fe MOF/IF</b>              | <b>1.51</b>         | <b>This work</b>                            |
| Fe-doped MOF CuCoSe@HCNFs                   | 1.57                | Appl. Catal. B: Environ.2021,293,120209.    |
| CoNiRu-NT                                   | 1.47                | Adv. Mater. 2022, 34, 2107488.              |
| NiFe-MS/MOF@NF                              | 1.74@50             | Adv. Sci. 2020, 7, 2001965.                 |
| CC/MOF-CoSe <sub>2</sub> @MoSe <sub>2</sub> | 1.53                | Chem. Eng. J. 2022, 429, 132379.            |
| LIA-Ni-BDC  LIA-MIL-101(Fe)                 | 1.59                | Adv. Funct. Mater. 2021, 31, 2102648.       |
| NFN-MOF/NF                                  | 1.56                | Adv. Energy Mater.2018, 8, 1801065.         |
| Co <sub>3</sub> S <sub>4</sub> /EC-MOF      | 1.55                | Adv. Mater. 2019, 31, 1806672.              |
| NiFe-MOF                                    | 1.6                 | Nat. Commun. 2017, 8, 15341.                |
| Co-MOF/NF                                   | 1.548               | Inorg. Chem. 2021, 60, 4047–4057.           |
| NiFeZn-MNS/NF                               | 1.52                | Electrochimica Acta, 2019, 318, 957-965.    |
| Fe-Ni@NC-CNTs                               | 1.98@145            | Angew.Chem.2018,130,9059–9064.              |
| defect-Ni-MOF                               | 1.5                 | Small 2020, 16, 1906564.                    |
| NiFe-MS/MOF@NF                              | 1.74@50             | Adv. Sci. 2020, 7, 2001965.                 |
| CoNiRu-NT                                   | 1.47                | Adv. Mater. 2022, 34, 2107488.              |
| IrO <sub>2</sub> @Ir-MOF                    | 1.53                | J. Mater. Chem. A, 2020, 8, 25687-25695.    |
| Fe doped MOF CoV@CoO                        | 1.53@20             | Nano Energy 2021, 88, 106238.               |
| FeNi(BDC)(DMF,F)/NF                         | 1.58                | Appl. Catal. B: Environ. 2019, 258, 118023. |
| NiFe(dobpdc)/NF                             | 1.59                | J. Mater. Chem. A, 2020, 8, 22974–22982.    |
| Ni@CoO@CoMOFC                               | 1.61                | J. Mater. Chem. A, 2021, 9, 22597-22602.    |
